# Supplementary material
Source: MDPI journal article supplement (https://www.mdpi.com/2071-1050/14/2/597)
Supplement: s1 [file s1]

## Supplementary material

**Spectral and soil quality index for monitoring environmental rehabilitation and soil carbon stock in an Amazonian sandstone mine**

**Paula Godinho Ribeiro<sup>1</sup>, Gabriel Caixeta Martins<sup>1</sup>, Markus Gastauer<sup>1</sup>, Ediu Carlos da Silva Junior<sup>1</sup>, Diogo Corrêa Santos<sup>1</sup>, Cecílio Frois Caldeira Júnior<sup>1</sup>, Rosane Barbosa Lopes Cavalcante<sup>1</sup>, Douglas Silva dos Santos<sup>1</sup>, Marco Aurélio Carbone Carneiro<sup>2</sup>, Rafael Borges da Silva Valadares<sup>1</sup>, Wilson da Rocha Nascimento Junior<sup>1</sup>, Guilherme Oliveira<sup>1</sup>, Pedro Walfir Martins e Souza Filho<sup>1</sup> and Silvio Junio Ramos<sup>1,\*</sup>**

<sup>1</sup>Instituto Tecnológico Vale, Rua Boaventura da Silva, 955, 66055-090 Belém, Pará, Brazil; paula.godinho.ribeiro@pq.itv.org (P.G.R.); gabriel.martins@pq.itv.org (G.C.M.); markus.gastauer@itv.org (M.G.); ediu.silva.junior@pq.itv.org (E.C.d.S.J.); diogo.correa@pq.itv.org (D.C.S.); cecilio.caldeira@itv.org (C.C.J.); rosane.cavalcante@itv.org (R.B.L.C.); douglas.silva.santos@aluno.itv.org (D.S.d.S.); rafael.borges.valadares@itv.org (R.B.d.S.V.); wilson.nascimento@itv.org (W.d.R.N.J.); guilherme.oliveira@vale.com (G.O.); pedro.martins.souza@itv.org (P.W.M.e.S.F.)

<sup>2</sup>Soil Science Department, Federal University of Lavras, Lavras, Minas Gerais, 37200-900, Brazil; marcocarbone@ufla.br

\*Correspondence: silvio.ramos@itv.org

**Table S1.** Geographic location of the studied areas

| Area | Onset activities | Latitude | Longitude  |
|------|------------------|----------|------------|
| NR   | -                | -6,09634 | -50,2279   |
| NR   | -                | -6,09677 | -50,2274   |
| NR   | -                | -6,0971  | -50,2279   |
| Ini  | 2014             | -6,09711 | -50,2286   |
| Ini  | 2014             | -6,09732 | -50,229    |
| Ini  | 2014             | -6,09761 | -50,2284   |
| Int  | 2006             | -6,09613 | -50,2288   |
| Int  | 2006             | -6,09629 | -50,2285   |
| Int  | 2006             | -6,09631 | -50,2287   |
| Adv  | 2004             | -6,09821 | -50,2303   |
| Adv  | 2004             | -6,09887 | -50,2303   |
| Adv  | 2004             | -6,09832 | -50,23     |
| RefA | -                | -6,09821 | -50,2308   |
| RefA | -                | -6,09881 | -50,2316   |
| RefA | -                | -6,09929 | -50,229177 |
| RefB | -                | -6,09673 | -50,226963 |
| RefB | -                | -6,09782 | -50,227338 |
| RefB | -                | -6,09825 | -50,227186 |

NR = nonrehabilitated; Ini = initial; Int = intermediate; Adv = advanced; RefA and Ref B = reference forest.

**Table S2.** Slope of the tangent to the curve at the point corresponding to the critical value of the indicator (Sl) was specific for each curve

| Curve          | SB     | Zn     | ACP    | SOC    | Mn     | P      | S      |
|----------------|--------|--------|--------|--------|--------|--------|--------|
| More is better | 1.6210 | 4.8784 | 0.0023 | 0.1687 | 0.1113 | 1.8108 | 0.3006 |
| Less is better | 1.5227 | 5.0506 | 0.0027 | 0.1588 | 0.1443 | 2.0080 | 0.5030 |

SB = sum of bases, ACP = acid phosphatase, SOC = soil organic carbon.

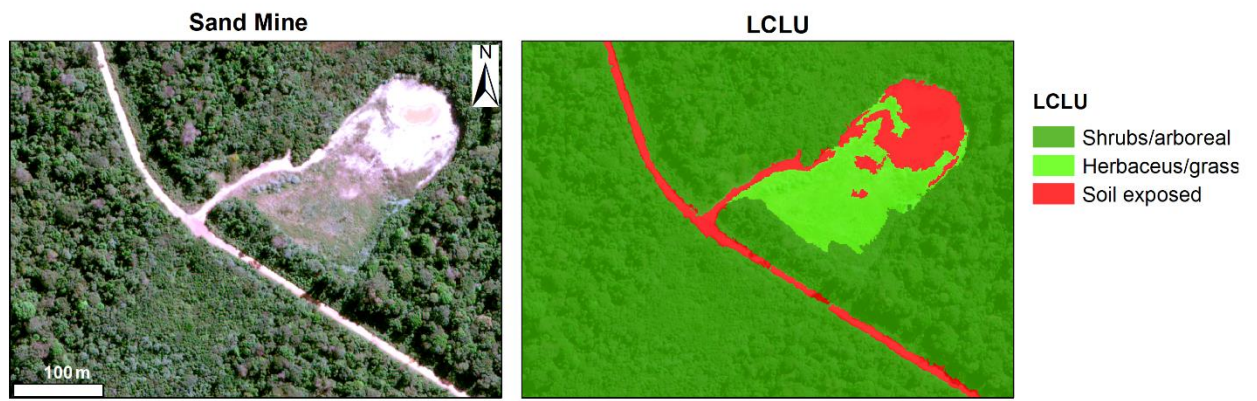

**Figure S1.** Digital maps of Land Cover and Land Use (LCLU)

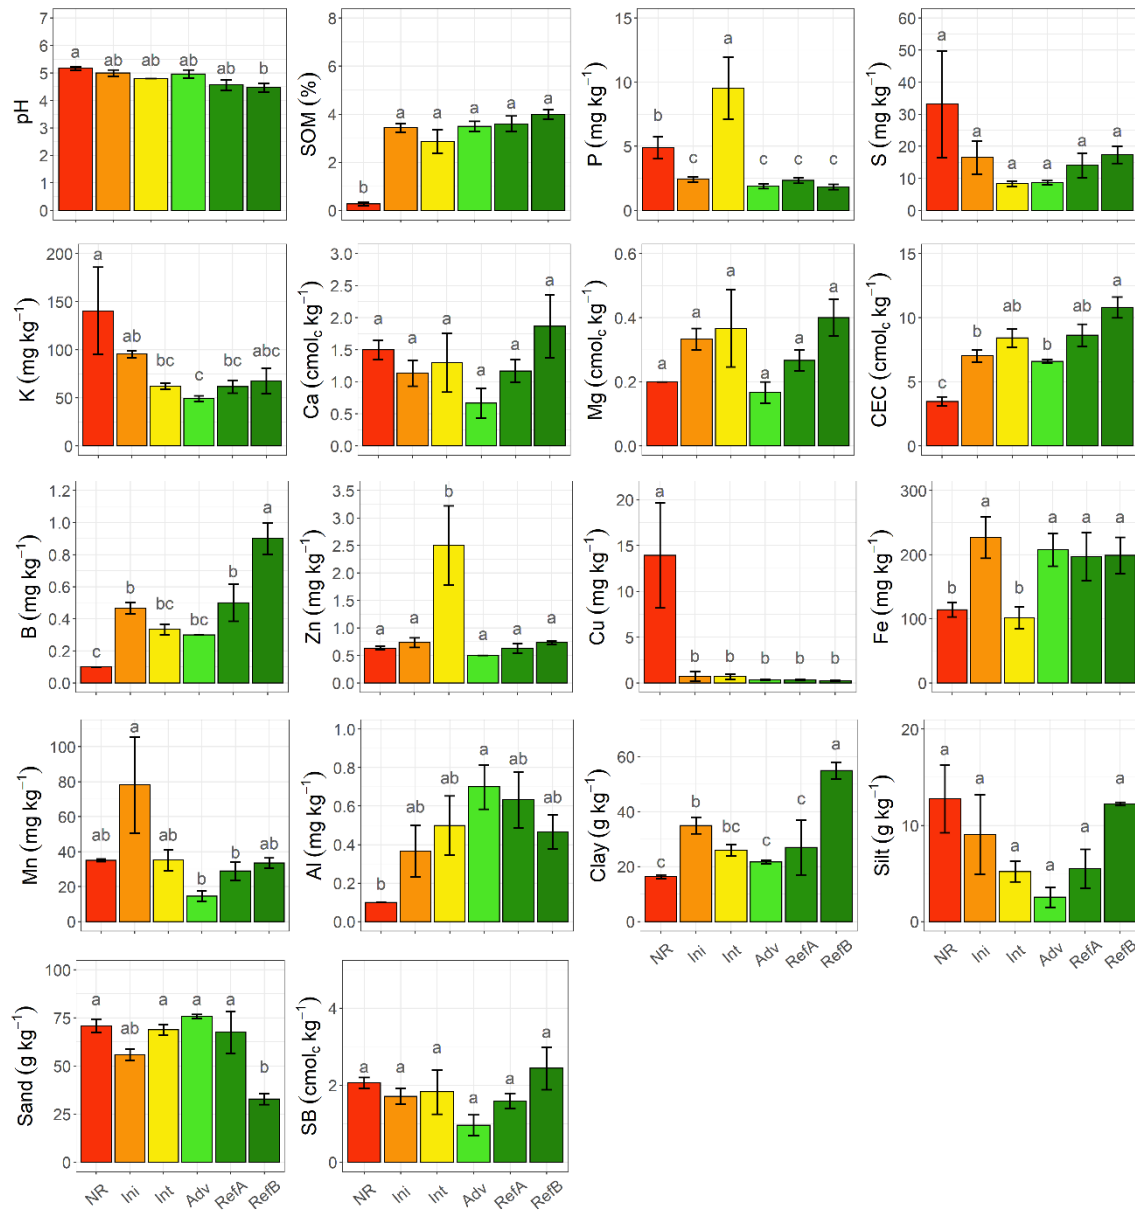

**Figure S2.** Chemical and physical soil attributes of chronosequences and reference forests. Different letters for each soil attribute indicate significant differences between means according to Tukey's test ( $p \leq 0.05$ ). NR = nonrehabilitated; Ini = initial; Int = intermediate; Adv = advanced; RefA and RefC = reference forest. Some of the variables presented are already shown in Rodríguez-Rodríguez et al. [1].

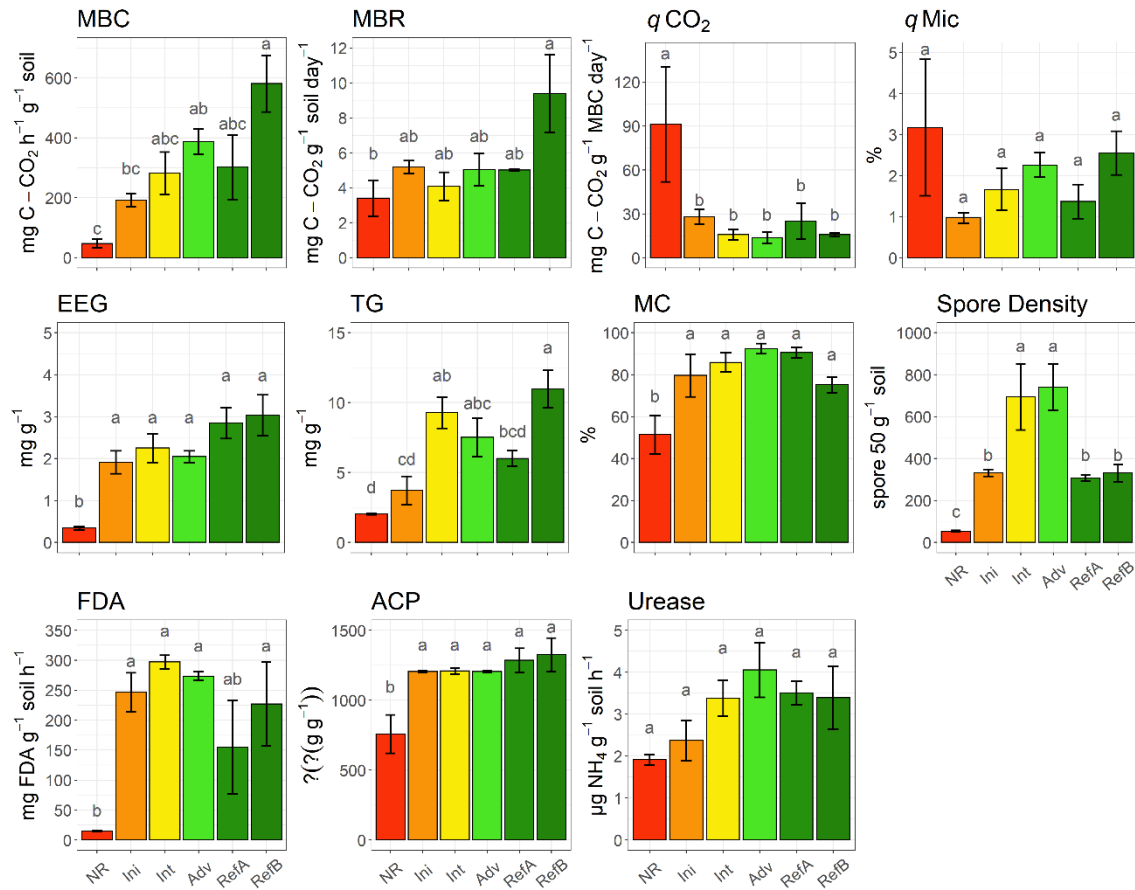

**Figure S3.** Biological and biochemical attributes of chronosequences and reference forests.

Different letters for each variable indicate significant differences between means according to a Tukey's test ( $p \leq 0.05$ ). NR = nonrehabilitated; Ini = initial; Int = intermediate; Adv = advanced; RefA and RefC = reference forest; MBC = microbial biomass carbon; MBR = microbial basal respiration,  $qCO_2$  = metabolic coefficient,  $qMic$  = microbial coefficient, EEG = extractable glomaline, TG = total glomaline, MC = micorrizal colonization, FDA = fluorescein diacetate analysis; ACP = acid phosphatase.

Some of the variables presented are already shown in Rodríguez-Rodríguez et al. [1].

## References

- [1] Rodríguez-Rodríguez, R.M.; Kemmelmeier, K.; Pedroso, D. de F.; Pinto, F.A.; dos Santos, J.V.; Gastauer, M.; Caldeira, C.F.; Ramos, S.J.; Siqueira, J.O.; Carneiro, M.A.C. Native arbuscular mycorrhizal fungi respond to rehabilitation in iron ore mining areas from the Eastern Brazilian Amazon. *Pedobiologia* **2021**, *89*, 150768. <https://doi.org/10.1016/j.pedobi.2021.150768>
